# Supplementary material for: Identification of serotonin 2A receptor as a novel HCV entry factor by a chemical biology strategy
Source: PubMed Central journal article supplement (PMC6338621; doi:10.1007/s13238-018-0521-z), 2018-03-14
Supplement: 13238_2018_521_MOESM1_ESM.pdf [file 13238_2018_521_MOESM1_ESM.pdf]

1

*Supporting Information for*

2

**Identification of serotonin 2A receptor as a novel HCV entry factor by a**

3

**chemical biology strategy**

4

**Supplementary Figures**

6 **S1 Fig**

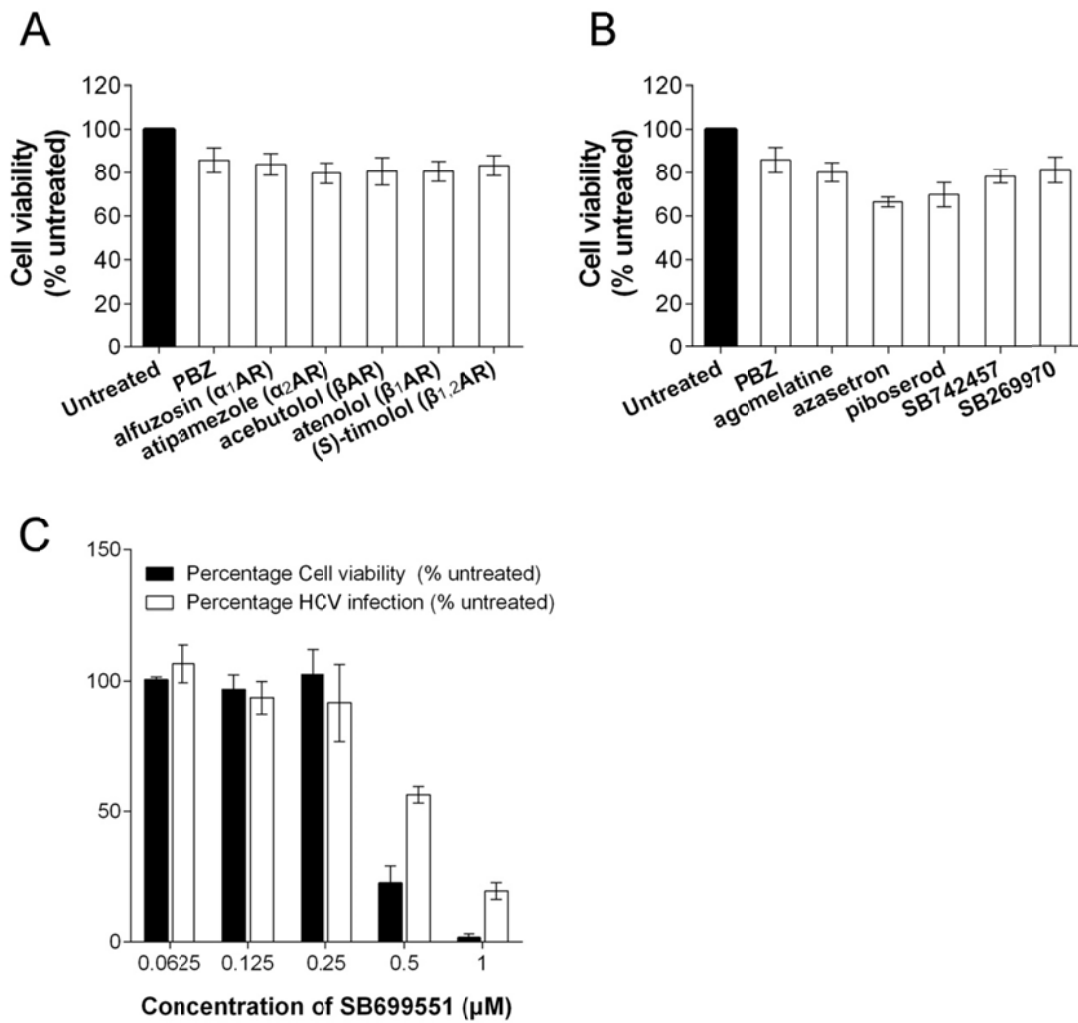

7

8 **S1 Fig. Cell variability of all chemicals and HCV inhibition of SB699551. (A, B)** Huh7.5.1  
9 cell variability in the presence of all chemical probes. Huh7.5.1 cells were treated with  
10 adrenergic receptors antagonists (**B**) and serotonin receptors antagonists (**C**) at the concentration  
11 of 10  $\mu$ M at 37 °C for 48 h. Cell viability are expressed as percentages relative to 0.5% DMSO-  
12 treated control cells. All results are graphed as the means  $\pm$  s.d. for triplicate samples. The data  
13 presented are representative of three independent experiments.

14

15

16

17

18

19

20

21

22

23

24

25

26

27

28

29

30

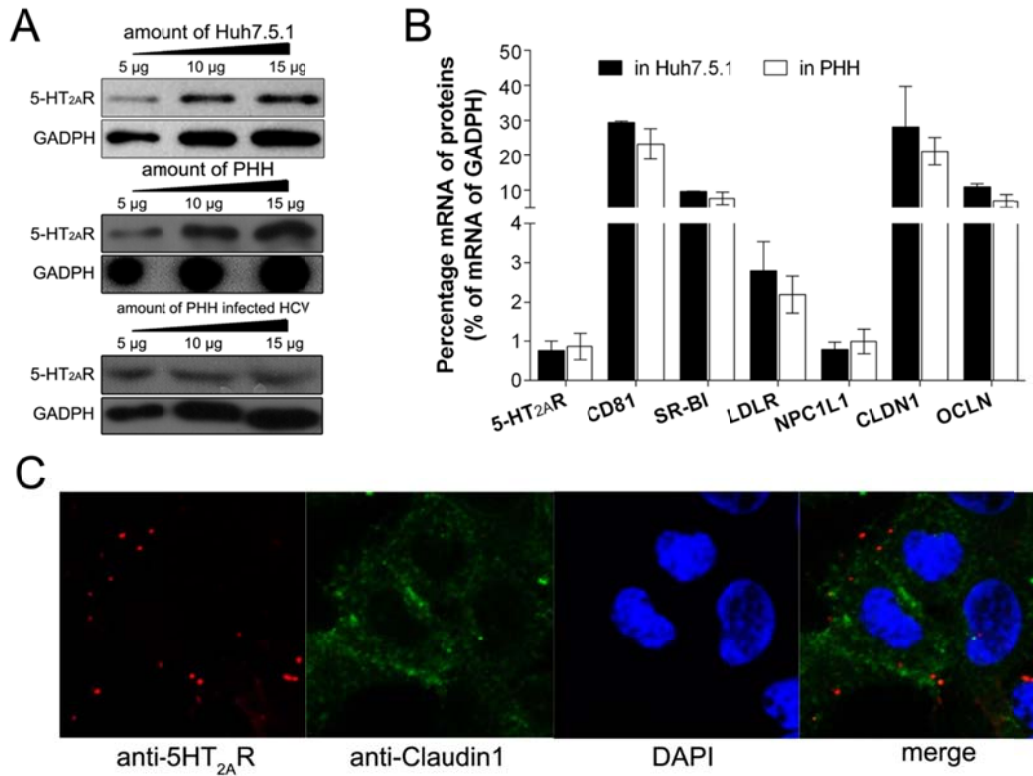

32

33 **S2 Fig. 5-HT<sub>2A</sub>R is expressed in Huh7.5.1 and PHH.** (A) Protein expression of 5-HT<sub>2A</sub>R in

34 Huh7.5.1 cells, PHHs and PHHs are infected HCV virus. Indicated amounts of cells were

35 analyzed by SDS-PAGE. The expression of host GADPH is shown as an internal control. (B)

36 The transcription levels of 5-HT<sub>2A</sub>R and known HCV receptors/entry factors in Huh7.5.1 cells

37 and PHHs. The mRNA copies of 5-HT<sub>2A</sub>R, CD81, SR-BI, LDLR, NPC1L1, CLDN1 and OCLN

38 were evaluated by qRT-PCR. The data are expressed as a percentage relative to mRNA copies of

39 host GADPH. All results are graphed as the means ± s.d. for triplicate samples. (C) Cellular

40 distribution of 5-HT<sub>2A</sub>R and Claudin-1. Huh7.5.1 cells were fixed, stained with primary anti-5-

41 HT<sub>2A</sub>R antibody and Cy3-labeled secondary antibody (red), and analyzed by confocal

42 microscopy. Claudin-1 were stained by green. Nuclei were stained by DAPI (blue).

43 **S3 Fig**

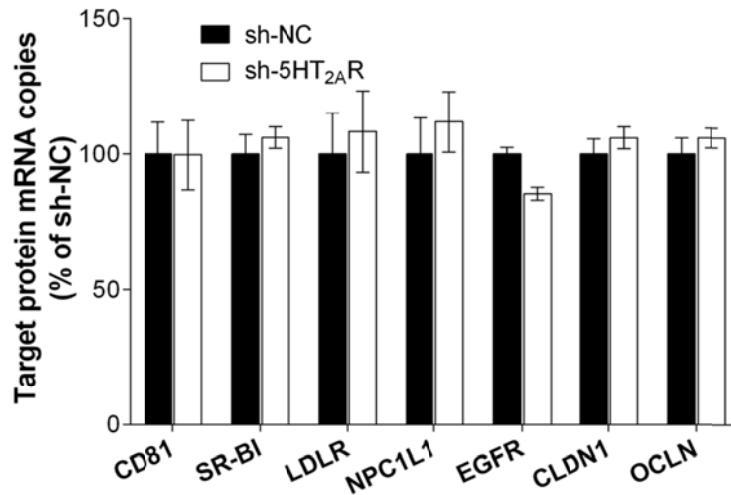

44

45 **S3 Fig. Silencing of 5-HT<sub>2A</sub>R does not down-regulate the transcription of other reported**

46 **HCV receptors/entry factors.** Huh7.5.1 cells were silenced with sh-NC or sh-5HT<sub>2A</sub>R. The

47 mRNA copies of CD81, SR-BI, LDLR, NPC1L1, CLDN1, EGFR and OCLN were evaluated by

48 qRT-PCR. The data are expressed as a percentage relative to sh-NC transfected cells. All results

49 are graphed as the means  $\pm$  s.d. for triplicate samples. The data presented are representative of

50 three independent experiments.

51

52

53

54

55

56

57

58

59 **S4 Fig**

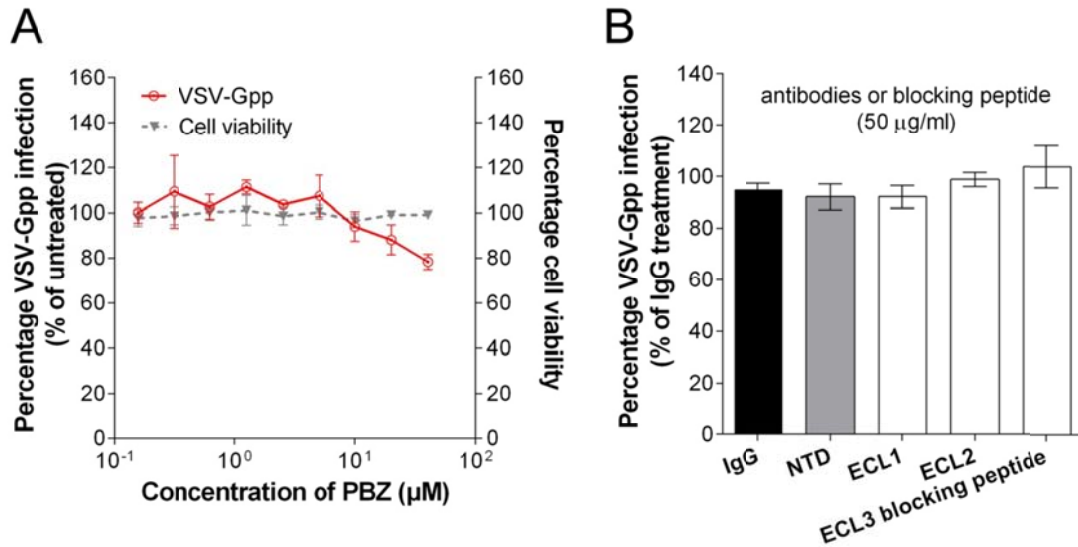

60

61 **S4 Fig. PBZ, mAb or blocking peptide does not inhibit VSV-Gpp.** Huh7.5.1 cells were  
62 infected by VSV-Gpp in the presence of PBZ (**A**), antibodies or blocking peptide (**B**) at the  
63 indicated concentrations at 37 °C for 48 h. Virus infection and cell viability are expressed as a  
64 percentage relative to DMSO- or buffer-treated control cells. All results are graphed as the  
65 means  $\pm$  s.d. for triplicate samples. The data presented are representative of three independent  
66 experiments.

67

68

69

70

71

72

73

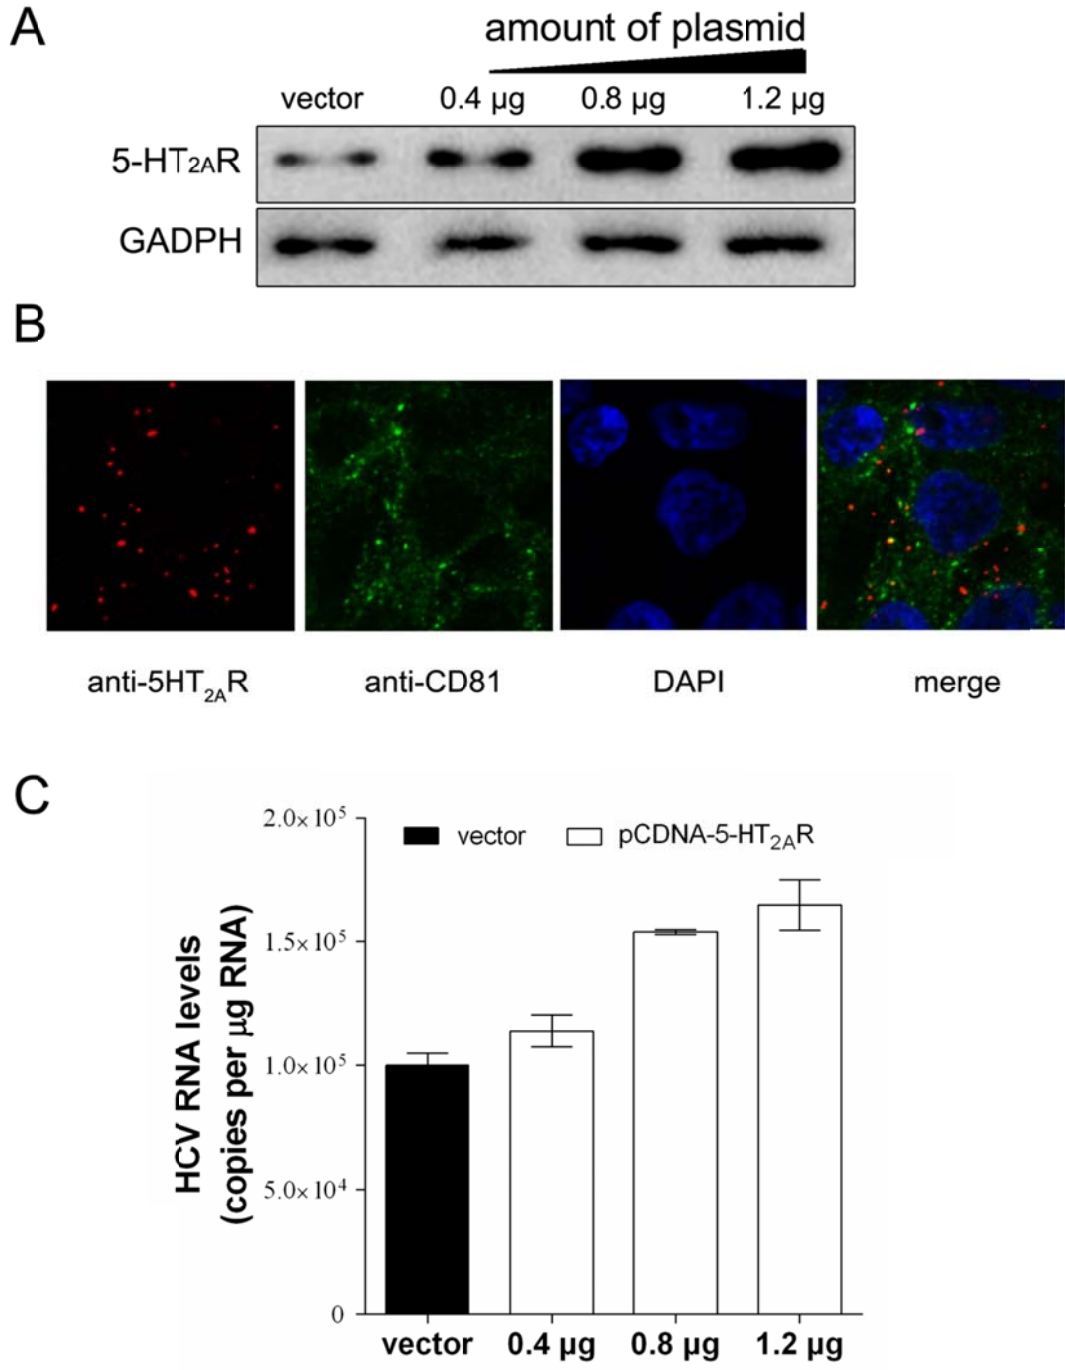

75

76 **S5 Fig. Overexpression of 5-HT<sub>2A</sub>R enhances HCV infection.** (A) Overexpression of 5-HT<sub>2A</sub>R

77 in Huh7.5.1 cells. Indicated amounts of 5-HT<sub>2A</sub>R<sup>wt</sup> overexpression plasmid (p5HT<sub>2A</sub>R<sup>wt</sup>) cells

78 were transfected into Huh7.5.1 cells and the expression of 5-HT<sub>2A</sub>R were analyzed by SDS-  
79 PAGE. The expression of host GAPDH is shown as an internal control. **(B)** Cellular distribution  
80 of overexpressed 5-HT<sub>2A</sub>R protein. Plasmid-transfected Huh7.5.1 cells were fixed, stained with  
81 primary anti-5-HT<sub>2A</sub>R antibody and Cy3-labeled secondary antibody (red), and analyzed by  
82 confocal microscopy. Claudin-1 were stained by green. Nuclei were stained by DAPI (blue). **(C)**  
83 Huh7.5.1 cells were transfected with p5HT<sub>2A</sub>R<sup>wt</sup> at the indicated amounts, followed by infection  
84 with HCVcc at 37 °C for 48 h. HCV infections were quantified by measuring the qRT-PCR and  
85 normalized to GAPDH. Virus infection is expressed as a percentage relative to that in empty  
86 plasmid-containing cells. Results are graphed as the means ± s.d. for triplicate samples. The data  
87 presented are representative of three independent experiments.

88

89

90

91

92

93

94

95

96

97

98

99

100

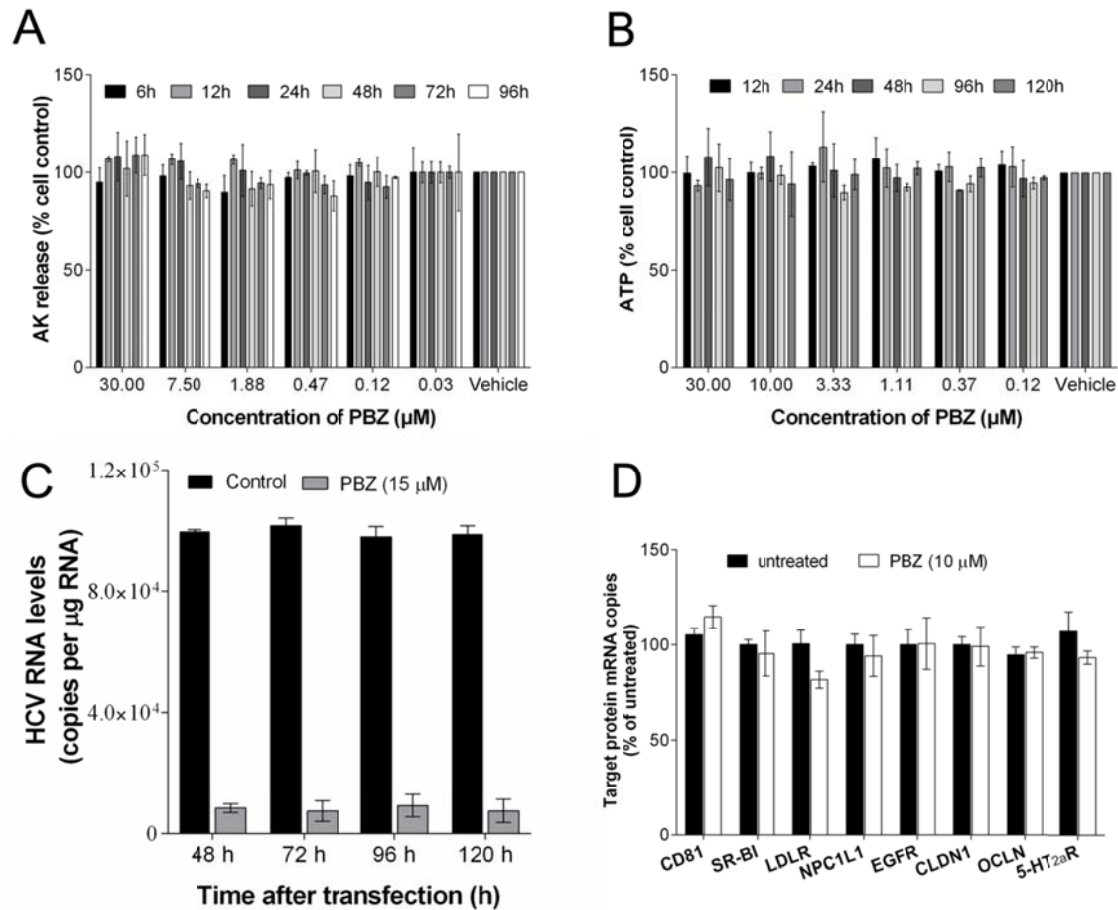

102

103 **S6 Fig. PBZ is non-cytotoxic, does not affect cell proliferation and does not affect the**  
 104 **transcription of known HCV receptors on Huh7.5.1 cells. (A, B)** At indicated time post-  
 105 treatment, culture supernatant was harvested and PBZ induced toxicity was determined by  
 106 measuring cellular release of adenylate kinase (AK) using the The ToxiLight<sup>TM</sup> bioassay kit (A),  
 107 or cultures were lysed and bioluminescence detection of cellular ATP was performed using the  
 108 The ATP Determination Kit as a quantitative measure of cell viability (B). Results are shown as  
 109 a percentage of relative luminescence (RLU) compared to vehicle-treated cells. (C) PBZ inhibit  
 110 HCV proliferation. Huh7.5.1 cells were treated with 15  $\mu\text{M}$  PBZ followed by HCVcc infection



111 over the course of 5 days. All results are graphed as the means  $\pm$  s.d. for triplicate samples. **(D)**  
112 PBZ treatment does not negative the transcription of other reported HCV receptors/entry factors.  
113 Huh7.5.1 cells were treated with PBZ (10  $\mu$ M) for 48h. The mRNA copies of CD81, SR-BI,  
114 LDLR, NPC1L1, CLDN1, EGFR and OCLN were evaluated by qRT-PCR. The data are  
115 expressed as a percentage relative to 0.5% DMSO-treated cells as controls. All results are  
116 graphed as the means  $\pm$  s.d. for triplicate samples.

117

118

119

120

121

122

123

124

125

126

127

128

129

130

131

132

133

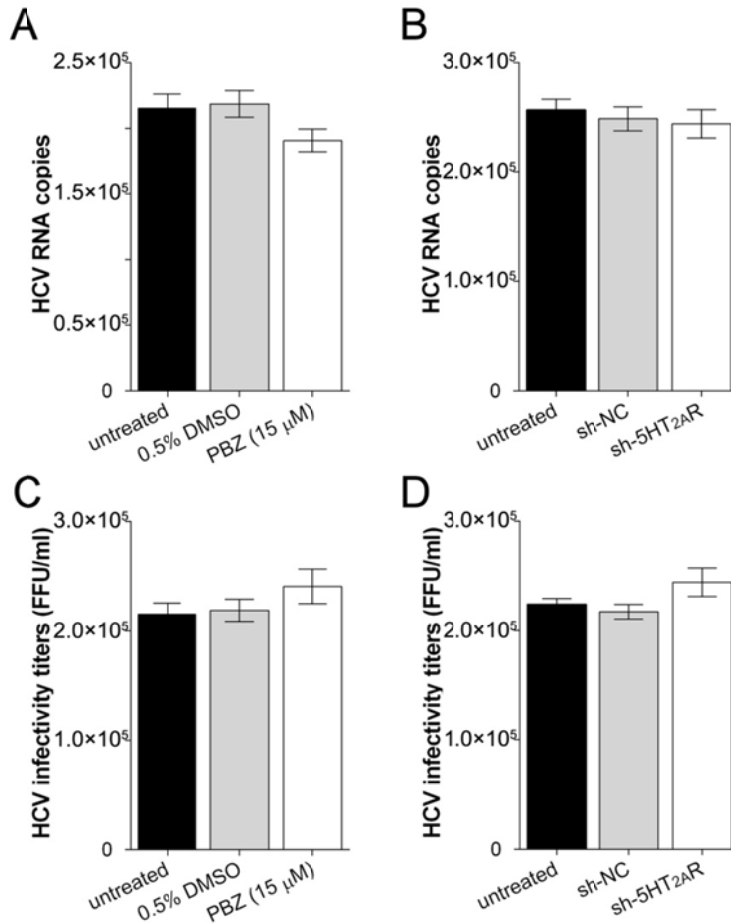

135

136 **S7 Fig. PBZ treatment and the silencing of 5-HT<sub>2A</sub>R do not inhibit full-length HCVcc RNA**137 **replication or secretion of infectious HCVcc.** Huh7.5.1 cells chronically infected with HCVcc138 were treated with 0.5% DMSO or 15  $\mu$ M PBZ, or were reverse transfected with 0.8  $\mu$ g of sh-NC139 or sh-5HT<sub>2A</sub>R. **(A, B)** At 48 h PBZ treatment or post-transfection, total intracellular RNA was140 extracted. HCV RNA levels were quantified by qRT-PCR and normalized to host GAPDH. **(C,**141 **D)** At 48 h PBZ treatment or post-transfection, HCVcc infectivity titers were determined. Results142 are graphed as the means  $\pm$  s.d. for triplicate samples.

143

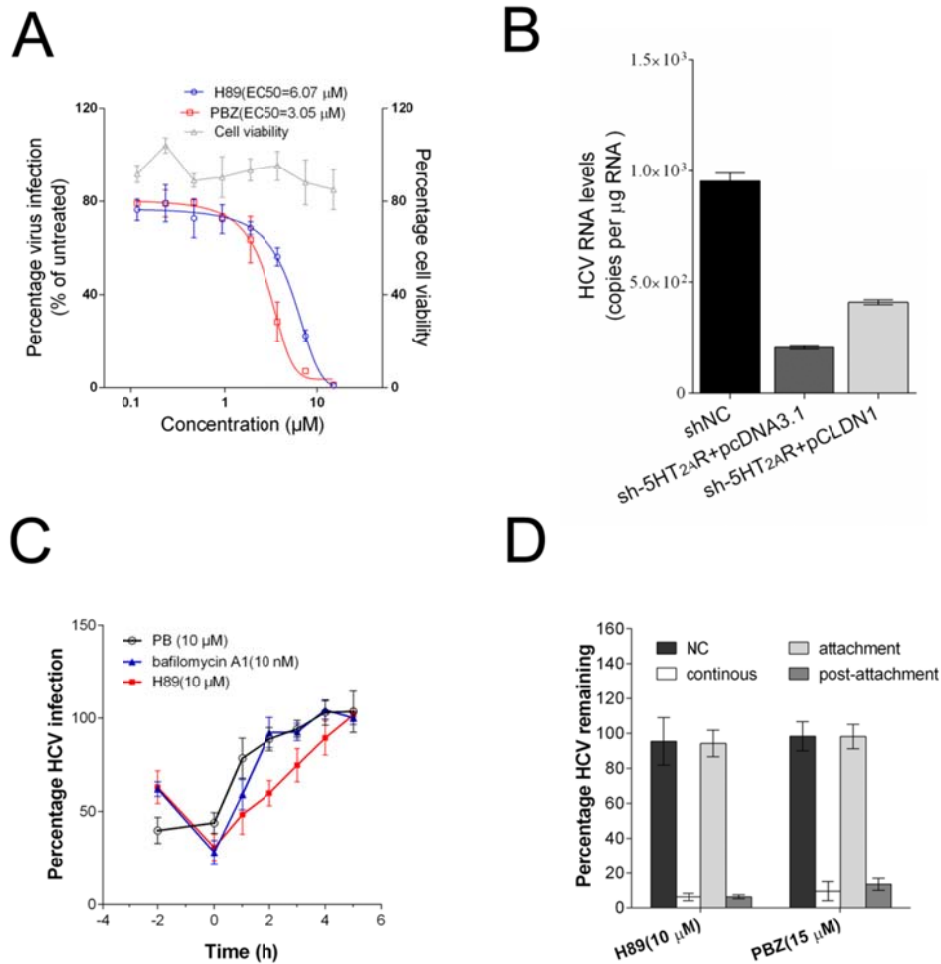

145 **S8 Fig. H89 plays the same functions in HCV proliferation like PBZ.** (A) Inhibitory activities  
 146 of PBZ (red line) and H89 (blue line) on HCVcc. Cells infected by HCVcc were treated with  
 147 PBZ or H89 at the indicated concentrations at 37 °C for 48 h. Virus infection and cell viability  
 148 are expressed as percentages relative to 0.5% DMSO-treated control cells. (B) HCVcc infection  
 149 is rescued by CLDN-1 overexpression. Huh7.5.1 cells containing sh-NC, sh-5HT<sub>2A</sub>R and  
 150 pcDNA empty plasmid, or sh-5HT<sub>2A</sub>R and pCLDN-1 were infected by HCVcc at 37 °C for 48 h.  
 151 Virus infection are shown HCV RNA levels, determined by RT-qPCR and normalized to  
 152 GAPDH, at the triplicate times after infection. (C) The kinetics of HCV inhibition mediated by  
 153

154 PBZ or H89 was determined by time-of-addition assays. Huh7.5.1 cells were incubated with  
155 HCVcc at 4 °C for 2 h (T = -2). At different time points (T = -2 to T = 5), PBZ (10 μM) and H89  
156 (10 μM) were individually added to the cells at 37 °C for 2 h. **(D)** H89 inhibits the post-  
157 attachment events. Huh7.5.1 cells were infected with HCVcc and incubated at 4 °C for 2 hours.  
158 Unbound virus was removed by two washes with cold media. Fresh medium was subsequently  
159 added, and the cells were shifted to 37 °C to allow synchronous infection. PBZ (10 μM) and H89  
160 (10 μM) were provided in the media either continuously, during the 4 °C incubation only (initial  
161 attachment), or during the 37 °C incubation phase only (post-attachment). Virus infection is  
162 expressed as a percentage relative to control cells. All results are graphed as the means ± s.d. for  
163 triplicate samples.
